# Supplementary material for: Increasing the number of cations in layered double hydroxides via mechanochemically complemented synthesis: the more the merrier, or not?
Source: Royal Society of Chemistry journal article supplement (doi:10.1039/d4mr00102h), 2025-01-01
Supplement: d4mr00102h1.pdf [file d4mr00102h1.pdf]

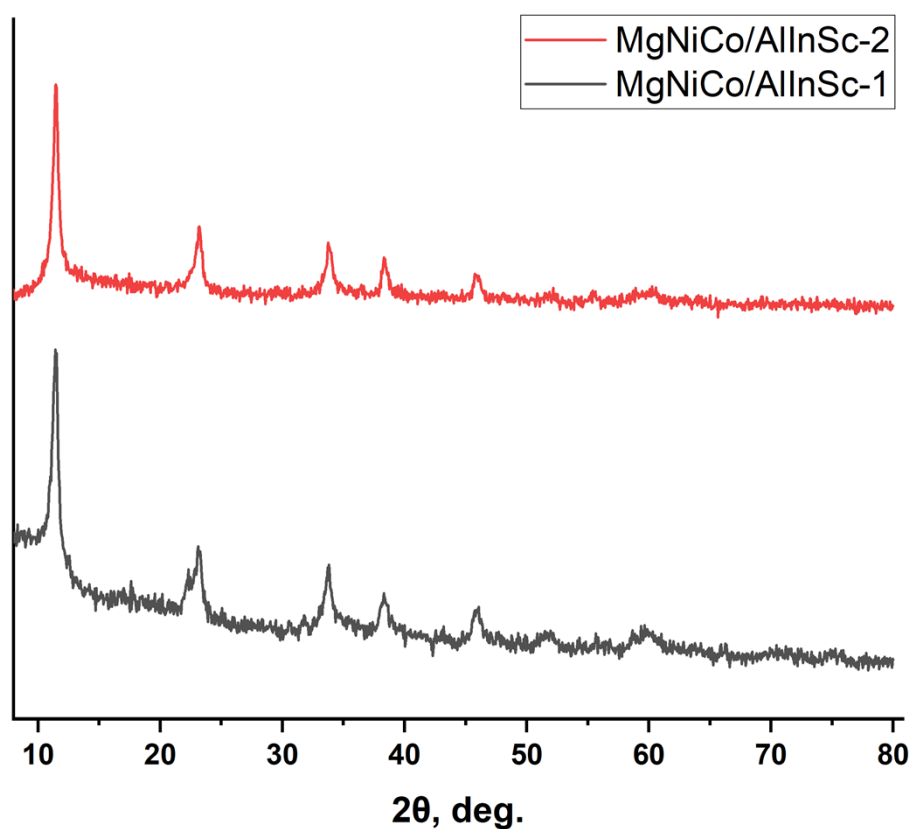

Fig. S0 X-ray diffraction of MgNiCo/AlInSc LDH sample before (black line) and after (red line) additional crystallization in 0.1 M  $\text{Na}_2\text{CO}_3$  solution

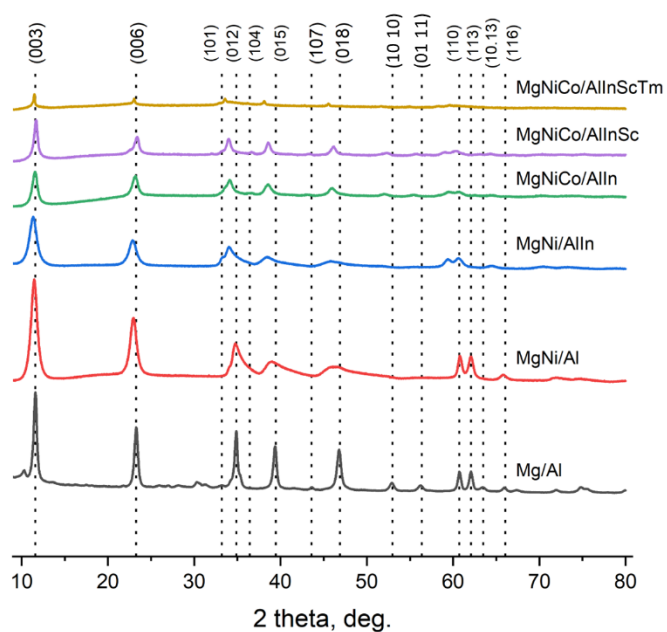

Fig. S1 Non-normalized X-ray diffraction of the LDHs from Mg/Al to MgNiCo/AlInScTm

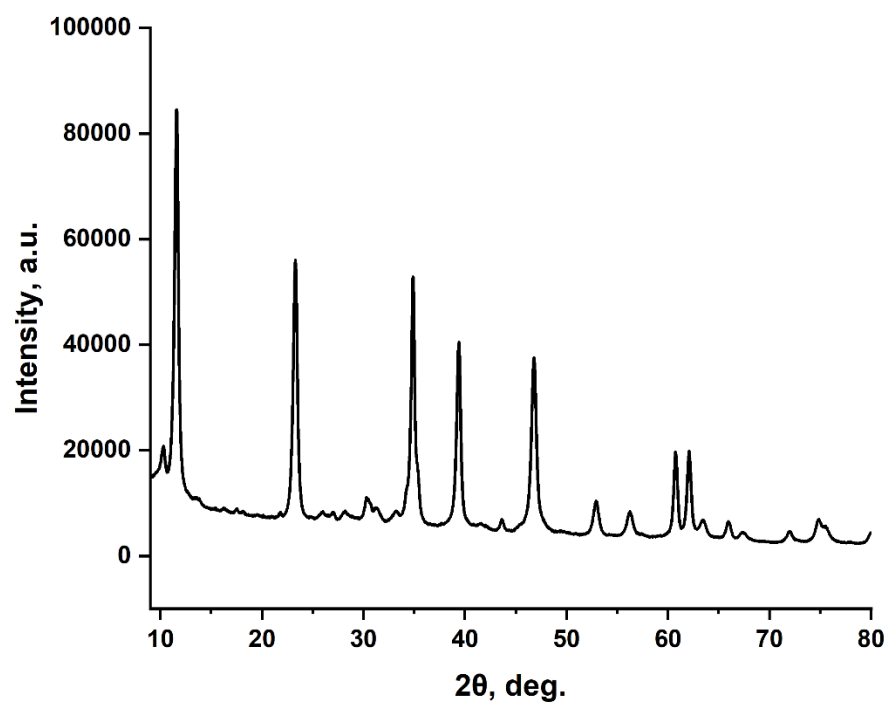

Fig. S2 X-ray diffraction of Mg/Al LDH sample

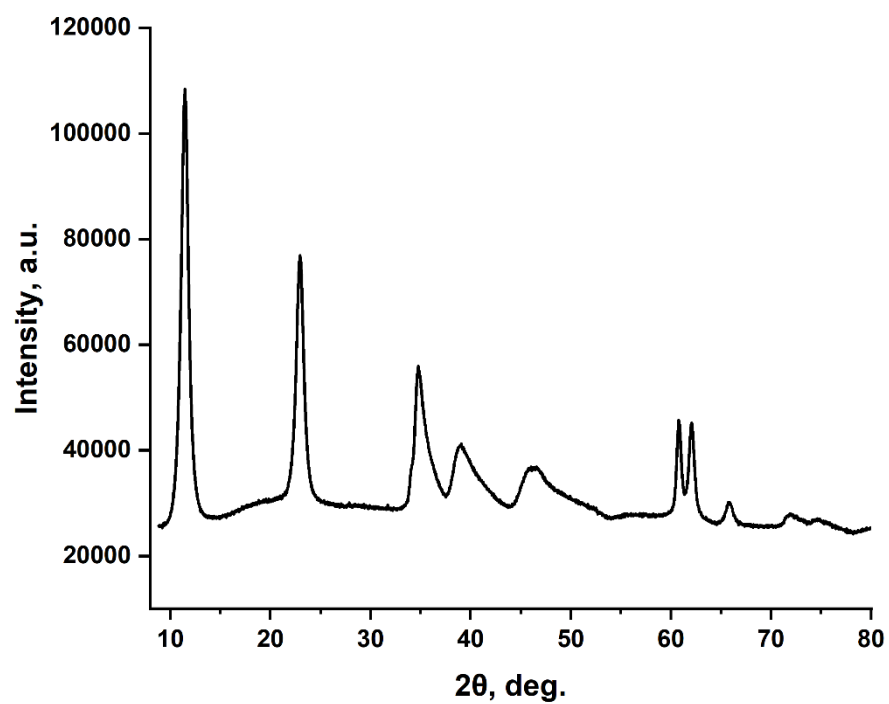

Fig. S3 X-ray diffraction of MgNi/Al LDH sample

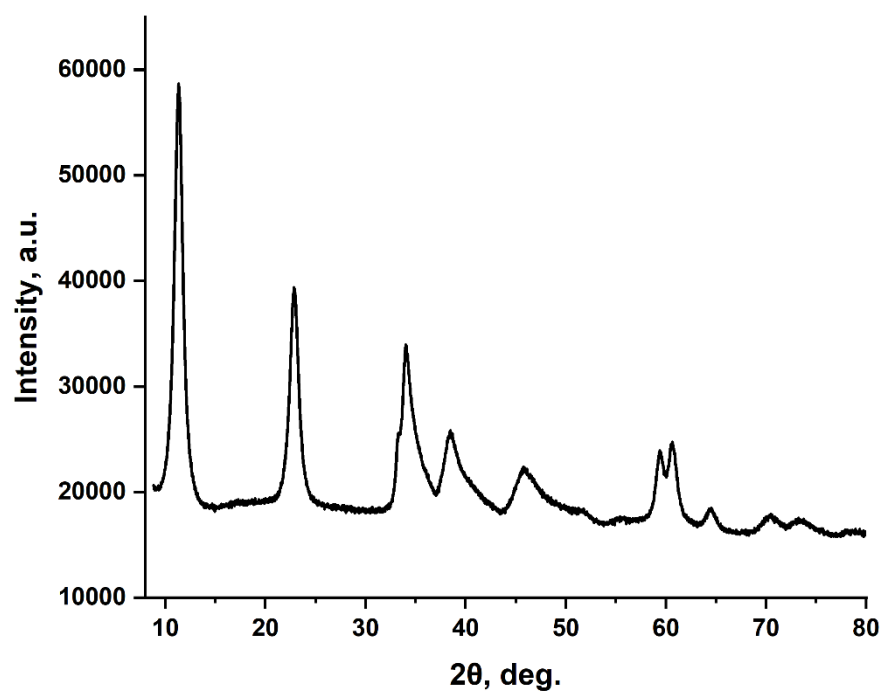

Fig. S4 X-ray diffraction of MgNi/AlIn LDH sample

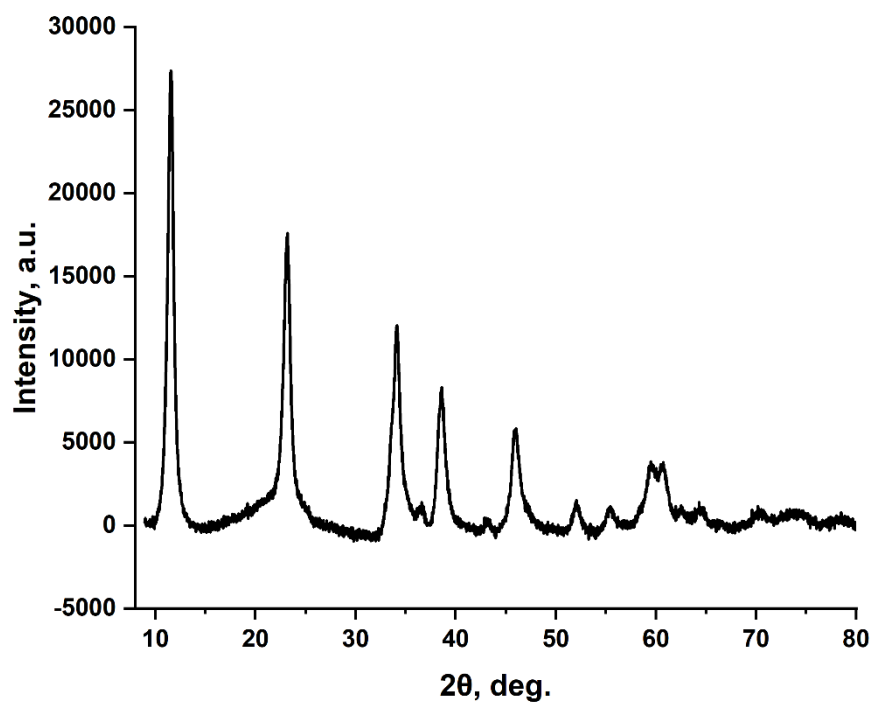

Fig. S5 X-ray diffraction of MgNiCo/AlIn LDH sample

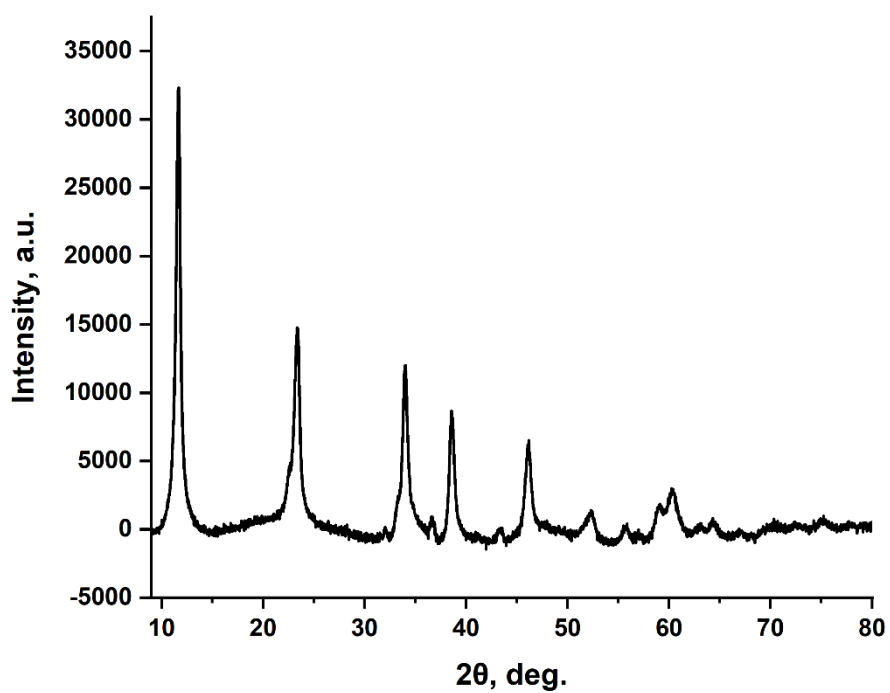

Fig. S6 X-ray diffraction of MgNiCo/AlInSc LDH sample

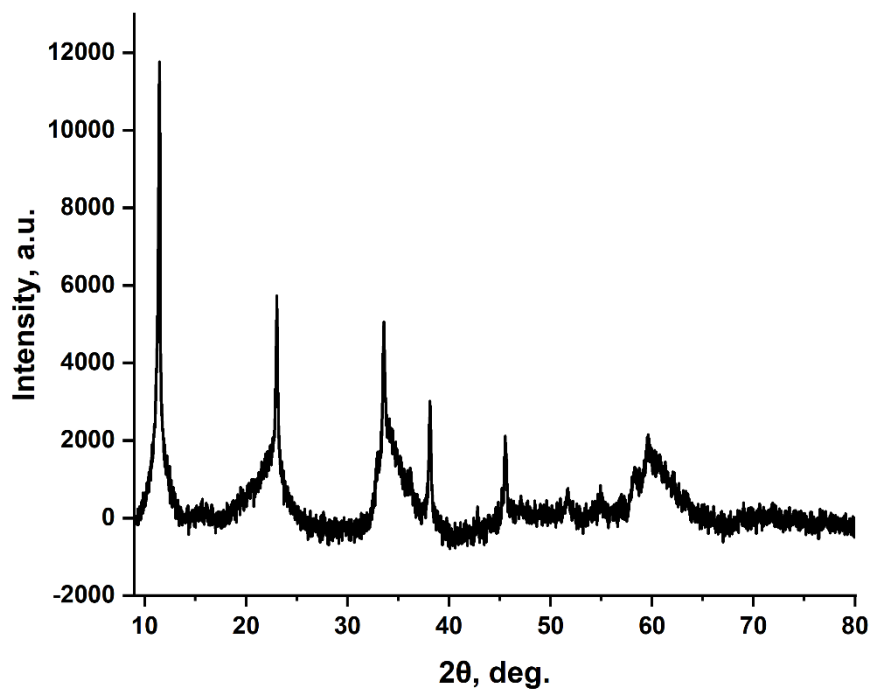

Fig. S7 X-ray diffraction of MgNiCo/AlInScTm LDH sample

## Full synthesis procedure

MgNiCo/AlInSc LDH as an example.

$\text{Me}^{2+}/\text{Me}^{3+}$  cation ratio = 3/1

Sum of divalent cations (Mg+Ni+Co) = 5 mmol, they were taken in an equimolar amount, so each one is 1.67 mmol.

Sum of trivalent cations (Al+In+Sc) = 1.67 mmol, they were also taken in an equimolar amount so each one is 0.56 mmol.

Initial reagents were mixed in an agate mortar and manually ground for 5 minutes at room temperature. After a homogeneous powder was obtained, solid  $\text{Na}_2\text{CO}_3$  (25 mmol) and NaOH (5 mmol) were added to it, and the mixture was subsequently ground for 30 minutes to obtain a viscous homogeneous paste. The paste was washed with distilled water (100 ml) into the hydrothermal synthesis vessel. The vessel was sealed and left for one day at 98 °C. We found experimentally that adding an additional saturated alkaline solution in the middle of the hydrothermal treatment of mechanochemically synthesized samples promoted the crystallization degree, so after 24 hours at 98 °C, the vessel was cooled for another day, and then a 0.1 M  $\text{Na}_2\text{CO}_3$  solution (100 ml) was added to the reaction mixture and left for two days at 98 °C. Then the vessel was cooled for a day, and the resulting precipitate was separated by centrifugation, washed with equivalent amount of distilled water three times, and then dried at 50 °C for two days.

## Configurational entropy calculation example

| Element | Weight % |
|---------|----------|
| C K     | 9.66     |
| O K     | 48.08    |
| Mg K    | 2.17     |
| Al K    | 2.10     |
| Sc K    | 3.25     |
| Co K    | 12.85    |
| Ni K    | 13.56    |
| In L    | 8.33     |

Fig. S8 EDAX results for 1 point on a MgNiCo/AlInSc LDH

| No of point         | Mg     | Al    | Sc    | Co    | Ni    | In     |
|---------------------|--------|-------|-------|-------|-------|--------|
| 1                   | 2.75   | 2.83  | 3.91  | 14.65 | 15.98 | 9.26   |
| 2                   | 2.53   | 2.28  | 4.00  | 18.11 | 19.98 | 9.92   |
| 3                   | 2.57   | 2.29  | 4.31  | 19.61 | 21.54 | 11.03  |
| 4                   | 2.59   | 2.23  | 3.94  | 18.81 | 20.73 | 9.71   |
| 5                   | 2.60   | 2.31  | 3.87  | 17.22 | 18.83 | 9.78   |
| 6                   | 3.87   | 2.96  | 2.75  | 10.98 | 12.20 | 1.32   |
| 7                   | 2.71   | 2.41  | 3.62  | 19.39 | 21.77 | 9.21   |
| 8                   | 2.00   | 1.85  | 3.11  | 13.39 | 14.39 | 8.11   |
| 9                   | 1.29   | 1.19  | 2.63  | 12.10 | 13.18 | 6.92   |
| 10                  | 2.55   | 2.29  | 3.86  | 16.94 | 18.27 | 9.93   |
| 11                  | 2.80   | 2.52  | 3.70  | 15.73 | 17.07 | 9.49   |
| 12                  | 2.17   | 2.10  | 3.25  | 12.85 | 13.56 | 8.33   |
| Mean                | 2.54   | 2.27  | 3.58  | 15.82 | 17.29 | 8.58   |
| Atomic weight       | 24.305 | 26.98 | 44.96 | 58.93 | 58.69 | 114.82 |
| Amount of substance | 0.10   | 0.08  | 0.08  | 0.27  | 0.29  | 0.07   |
| Mole fraction       | 0.12   | 0.09  | 0.09  | 0.30  | 0.33  | 0.08   |

Experimental  $\text{Me}^{2+}/\text{Me}^{3+}$  cation ratio =  
 $(0.12+0.33+0.30)/(0.09+0.08+0.09) = 2.9$

$$S_{conf} = -R \sum_{i=1}^N x_i \ln x_i$$

Where x is a mole fraction of each Me, so

$$-R*((0.12*\ln(0.12))+(0.09*(\ln(0.09))+(0.09*(\ln(0.09))+(0.30*(\ln(0.30))+(0.33*\ln(0.33))+0.08*(\ln(0.08))))=$$

**1.62R**

### **Crystallinity index**

<https://youtu.be/D65k1yHPKaM?si=42R4udu4WEpKxjfK> – we calculated the crystallinity indexes of our samples using this method of Dr. Shahid Ali from the Department of Physics, University of Peshawar.

### **Microstrain calculation**

[https://youtu.be/T95MDQStcGY?si=BvKC\\_Jw2QaV\\_31SV](https://youtu.be/T95MDQStcGY?si=BvKC_Jw2QaV_31SV) – we calculated the microstrains of our samples using the Halder-Wagner-Landford method described on this channel.
